# Supplementary material for: Active-Q: Validation of the Web-Based Physical Activity Questionnaire Using Doubly Labeled Water
Source: J Med Internet Res. 2012 Feb 15;14(1):e29. doi: 10.2196/jmir.1974 (PMC3374527; doi:10.2196/jmir.1974)
Supplement: Supplementary file 1 [file jmir_v14i1e29_app1.pdf]

**Active-Q – A Physical Activity Questionnaire for Adults**

The following questions concern your physical activity during the last year

**Physical activity level – daily occupation**

What is your normal activity level at your daily occupation (work, studies or equivalent)?

| Mostly<br>Sitting     | A combination of<br>sitting and standing<br>up | Mostly<br>standing up | Some physical<br>activity | Heavy<br>manual labor |
|-----------------------|------------------------------------------------|-----------------------|---------------------------|-----------------------|
| <input type="radio"/> | <input type="radio"/>                          | <input type="radio"/> | <input type="radio"/>     | <input type="radio"/> |

**Duration – daily occupation**

Approximately how many hours per week do you normally conduct your daily occupation (work, studies or equivalent)?

- ☐ 5 hours or less  
☐ 6 - 10 hours  
☐ 11 – 20 hours  
☐ 21 – 30 hours  
☐ 31 – 40 hours  
☐ 41 – 50 hours  
☐ More than 50 hours  
☐ Don't know / Don't want to answer

**Means of transportation to daily occupation**

How do you normally get to and from work, studies or other daily occupation?

- ☐ Walking                                      ☐ By bus, train, subway or boat  
☐ Cycling                                        ☐ Other  
☐ By motorcycle, moped or scooter    ☐ Does not apply to me  
☐ By car or taxi                                ☐ Don't know / Don't want to answer

**Follow-up questions regarding means of transportation.**

**Selected activities in the previous screening question are presented to the respondent**

How often do you get to your daily occupation in the following ways and approximately how long does it take?

|         | Number of days<br>per week                                                                                                                                                                | Time, one way per day                                                                                                                                                                                                                                   |
|---------|-------------------------------------------------------------------------------------------------------------------------------------------------------------------------------------------|---------------------------------------------------------------------------------------------------------------------------------------------------------------------------------------------------------------------------------------------------------|
| Walking | <input type="radio"/> 1<br><input type="radio"/> 2<br><input type="radio"/> 3<br><input type="radio"/> 4<br><input type="radio"/> 5<br><input type="radio"/> 6<br><input type="radio"/> 7 | <input type="radio"/> Less than 15 minutes<br><input type="radio"/> 15 - 29 minutes<br><input type="radio"/> 30 - 44 minutes<br><input type="radio"/> 45 - 59 minutes<br><input type="radio"/> 1 - 2 hours<br><input type="radio"/> Longer than 2 hours |

|                                 | Number of days<br>per week                                                                                                                                                                | Time, one way per day                                                                                                                                                                                                                                   |
|---------------------------------|-------------------------------------------------------------------------------------------------------------------------------------------------------------------------------------------|---------------------------------------------------------------------------------------------------------------------------------------------------------------------------------------------------------------------------------------------------------|
| Cycling                         | <input type="radio"/> 1<br><input type="radio"/> 2<br><input type="radio"/> 3<br><input type="radio"/> 4<br><input type="radio"/> 5<br><input type="radio"/> 6<br><input type="radio"/> 7 | <input type="radio"/> Less than 15 minutes<br><input type="radio"/> 15 - 29 minutes<br><input type="radio"/> 30 - 44 minutes<br><input type="radio"/> 45 - 59 minutes<br><input type="radio"/> 1 - 2 hours<br><input type="radio"/> Longer than 2 hours |
| By motorcycle, moped or scooter | <input type="radio"/> 1<br><input type="radio"/> 2<br><input type="radio"/> 3<br><input type="radio"/> 4<br><input type="radio"/> 5<br><input type="radio"/> 6<br><input type="radio"/> 7 | <input type="radio"/> Less than 15 minutes<br><input type="radio"/> 15 - 29 minutes<br><input type="radio"/> 30 - 44 minutes<br><input type="radio"/> 45 - 59 minutes<br><input type="radio"/> 1 - 2 hours<br><input type="radio"/> Longer than 2 hours |
| By car or taxi                  | <input type="radio"/> 1<br><input type="radio"/> 2<br><input type="radio"/> 3<br><input type="radio"/> 4<br><input type="radio"/> 5<br><input type="radio"/> 6<br><input type="radio"/> 7 | <input type="radio"/> Less than 15 minutes<br><input type="radio"/> 15 - 29 minutes<br><input type="radio"/> 30 - 44 minutes<br><input type="radio"/> 45 - 59 minutes<br><input type="radio"/> 1 - 2 hours<br><input type="radio"/> Longer than 2 hours |
| By bus, train, subway or boat   | <input type="radio"/> 1<br><input type="radio"/> 2<br><input type="radio"/> 3<br><input type="radio"/> 4<br><input type="radio"/> 5<br><input type="radio"/> 6<br><input type="radio"/> 7 | <input type="radio"/> Less than 15 minutes<br><input type="radio"/> 15 - 29 minutes<br><input type="radio"/> 30 - 44 minutes<br><input type="radio"/> 45 - 59 minutes<br><input type="radio"/> 1 - 2 hours<br><input type="radio"/> Longer than 2 hours |
| Other                           | <input type="radio"/> 1<br><input type="radio"/> 2<br><input type="radio"/> 3<br><input type="radio"/> 4<br><input type="radio"/> 5<br><input type="radio"/> 6<br><input type="radio"/> 7 | <input type="radio"/> Less than 15 minutes<br><input type="radio"/> 15 - 29 minutes<br><input type="radio"/> 30 - 44 minutes<br><input type="radio"/> 45 - 59 minutes<br><input type="radio"/> 1 - 2 hours<br><input type="radio"/> Longer than 2 hours |

### Leisure time activities

Which of the following activities do you engage in at least once per week in your leisure time?

- |                                                                                                               |                                                                                                        |
|---------------------------------------------------------------------------------------------------------------|--------------------------------------------------------------------------------------------------------|
| <input type="checkbox"/> Watching TV/DVDs etc.                                                                | <input type="checkbox"/> Dancing                                                                       |
| <input type="checkbox"/> Using the computer, reading emails, playing computer games, play station, X-box etc. | <input type="checkbox"/> Walking, Nordic walking, walking a dog (not as transport to daily occupation) |
| <input type="checkbox"/> Sitting reading, writing, sewing etc.                                                | <input type="checkbox"/> Bicycling (not as transport to daily occupation)                              |
| <input type="checkbox"/> Playing a musical instrument or active computer games (e.g. Wii)                     | <input type="radio"/> None of the above                                                                |
| <input type="checkbox"/> Doing household chores (e.g. cleaning, laundry, child care, gardening etc.)          | <input type="radio"/> Don't know /Don't want to answer                                                 |
| <input type="checkbox"/> Shopping, or other errands                                                           |                                                                                                        |

**Follow-up questions regarding leisure time activities.****Selected activities in the previous screening question are presented to the respondent**

How many days per week do you dedicate time to the following leisure time activities and how much time do you spend per day on the activity?

|                                                                                            | Number of days<br>per week                                                                                                                                                                | Total time per day                                                                                                                                                                                                                               |
|--------------------------------------------------------------------------------------------|-------------------------------------------------------------------------------------------------------------------------------------------------------------------------------------------|--------------------------------------------------------------------------------------------------------------------------------------------------------------------------------------------------------------------------------------------------|
| Watching TV/DVDs                                                                           | <input type="radio"/> 1<br><input type="radio"/> 2<br><input type="radio"/> 3<br><input type="radio"/> 4<br><input type="radio"/> 5<br><input type="radio"/> 6<br><input type="radio"/> 7 | <input type="radio"/> Less than 30 minutes<br><input type="radio"/> 30 - 59 minutes<br><input type="radio"/> 1 - 2 hours<br><input type="radio"/> 3 - 4 hours<br><input type="radio"/> 5 - 8 hours<br><input type="radio"/> Longer than 8 hours  |
| Using the computer                                                                         | <input type="radio"/> 1<br><input type="radio"/> 2<br><input type="radio"/> 3<br><input type="radio"/> 4<br><input type="radio"/> 5<br><input type="radio"/> 6<br><input type="radio"/> 7 | <input type="radio"/> Less than 30 minutes<br><input type="radio"/> 30 - 59 minutes<br><input type="radio"/> 1 - 2 hours<br><input type="radio"/> 3 - 4 hours<br><input type="radio"/> 5 - 8 hours<br><input type="radio"/> Longer than 8 hours  |
| Sitting writing, reading, sewing etc.                                                      | <input type="radio"/> 1<br><input type="radio"/> 2<br><input type="radio"/> 3<br><input type="radio"/> 4<br><input type="radio"/> 5<br><input type="radio"/> 6<br><input type="radio"/> 7 | <input type="radio"/> Less than 30 minutes<br><input type="radio"/> 30 - 59 minutes<br><input type="radio"/> 1 - 2 hours<br><input type="radio"/> 3 - 4 hours<br><input type="radio"/> 5 - 8 hours<br><input type="radio"/> Longer than 8 hours] |
| Playing a musical instrument or active computer games (e.g. Wii)                           | <input type="radio"/> 1<br><input type="radio"/> 2<br><input type="radio"/> 3<br><input type="radio"/> 4<br><input type="radio"/> 5<br><input type="radio"/> 6<br><input type="radio"/> 7 | <input type="radio"/> Less than 30 minutes<br><input type="radio"/> 30 - 59 minutes<br><input type="radio"/> 1 - 2 hours<br><input type="radio"/> 3 - 4 hours<br><input type="radio"/> 5 - 8 hours<br><input type="radio"/> Longer than 8 hours  |
| Doing household chores, cleaning, doing laundry, taking care of children, garden work etc. | <input type="radio"/> 1<br><input type="radio"/> 2<br><input type="radio"/> 3<br><input type="radio"/> 4<br><input type="radio"/> 5<br><input type="radio"/> 6<br><input type="radio"/> 7 | <input type="radio"/> Less than 30 minutes<br><input type="radio"/> 30 - 59 minutes<br><input type="radio"/> 1 - 2 hours<br><input type="radio"/> 3 - 4 hours<br><input type="radio"/> 5 - 8 hours<br><input type="radio"/> Longer than 8 hours  |
| Shopping or other errands                                                                  | <input type="radio"/> 1<br><input type="radio"/> 2<br><input type="radio"/> 3<br><input type="radio"/> 4<br><input type="radio"/> 5<br><input type="radio"/> 6<br><input type="radio"/> 7 | <input type="radio"/> Less than 30 minutes<br><input type="radio"/> 30 - 59 minutes<br><input type="radio"/> 1 - 2 hours<br><input type="radio"/> 3 - 4 hours<br><input type="radio"/> 5 - 8 hours<br><input type="radio"/> Longer than 8 hours  |

|                                                                                 | Number of days<br>per week                                                                                                                                                                | Total time per day                                                                                                                                                                                                                                      |
|---------------------------------------------------------------------------------|-------------------------------------------------------------------------------------------------------------------------------------------------------------------------------------------|---------------------------------------------------------------------------------------------------------------------------------------------------------------------------------------------------------------------------------------------------------|
| Dancing (e.g. disco or ball room)                                               | <input type="radio"/> 1<br><input type="radio"/> 2<br><input type="radio"/> 3<br><input type="radio"/> 4<br><input type="radio"/> 5<br><input type="radio"/> 6<br><input type="radio"/> 7 | <input type="radio"/> Less than 30 minutes<br><input type="radio"/> 30 - 59 minutes<br><input type="radio"/> 1 - 2 hours<br><input type="radio"/> 3 - 4 hours<br><input type="radio"/> 5 - 8 hours<br><input type="radio"/> Longer than 8 hours         |
| Walking (not as transport to daily occupation), Nordic walking or walking a dog | <input type="radio"/> 1<br><input type="radio"/> 2<br><input type="radio"/> 3<br><input type="radio"/> 4<br><input type="radio"/> 5<br><input type="radio"/> 6<br><input type="radio"/> 7 | <input type="radio"/> Less than 15 minutes<br><input type="radio"/> 15 – 29 minutes<br><input type="radio"/> 30 – 44 minutes<br><input type="radio"/> 45 – 59 minutes<br><input type="radio"/> 1 – 2 hours<br><input type="radio"/> Longer than 2 hours |
| Cycling (not as transport to daily occupation)                                  | <input type="radio"/> 1<br><input type="radio"/> 2<br><input type="radio"/> 3<br><input type="radio"/> 4<br><input type="radio"/> 5<br><input type="radio"/> 6<br><input type="radio"/> 7 | <input type="radio"/> Less than 15 minutes<br><input type="radio"/> 15 – 29 minutes<br><input type="radio"/> 30 – 44 minutes<br><input type="radio"/> 45 – 59 minutes<br><input type="radio"/> 1 – 2 hours<br><input type="radio"/> Longer than 2 hours |

### Overall sporting activity or exercise

Do you exercise or participate in any sporting activities regularly?

- ☐ Yes  
☐ No  
☐ Don't know / Don't want to answer

### Sporting activities

What kind of exercise or sports activities do you participate in? If your type of activity is not included in the list below, please choose the most similar one.

- ☐ Aerobics or cardio fitness class  
☐ Weight lifting  
☐ Jogging, running or orienteering  
☐ Athletics (e.g. high jump, long jump or three-step)  
☐ Spinning or cycling in demanding terrain  
☐ Swimming  
☐ Ball sports (e.g. soccer, basketball, volley ball or floorball)  
☐ Golf

- ☐ Dance class or competitive dancing (e.g. ballroom, ballet, jazz or street)  
☐ Horseback riding  
☐ Skating, ice hockey or bandy  
☐ Skiing downhill or cross country  
☐ Martial arts (e.g. judo or karate)  
☐ Boxing or wrestling  
☐ Tennis, badminton or table tennis  
☐ Squash  
☐ Sailing, surfing, canoeing or rowing  
☐ Motor sports (e.g. motocross)  
☐ Rock climbing  
☐ Yoga, Pilates or Tai chi  
☐ Other activity or sport (please state) \_\_\_\_\_  
☐ None of these  
☐ Don't know / Don't want to answer

### Follow-up questions regarding regular sporting activities

Selected activities in the previous screening question are presented to the respondent

How often do you participate in the following sports or the following activities and for how long each time?

|                                                     | Number of times                                                                                                                                                                                                    | Time per session                                                                                                                                                                                              |
|-----------------------------------------------------|--------------------------------------------------------------------------------------------------------------------------------------------------------------------------------------------------------------------|---------------------------------------------------------------------------------------------------------------------------------------------------------------------------------------------------------------|
| Aerobics or cardio fitness class                    | <input type="radio"/> 1 - 3 times a month<br><input type="radio"/> Once a week<br><input type="radio"/> 2 - 3 times a week<br><input type="radio"/> 4 - 5 times a week<br><input type="radio"/> 6 - 7 times a week | <input type="radio"/> Less than 30 minutes<br><input type="radio"/> 30 - 59 minutes<br><input type="radio"/> 60 - 119 minutes<br><input type="radio"/> 2 - 4 hours<br><input type="radio"/> More than 4 hours |
| Weight lifting                                      | <input type="radio"/> 1 - 3 times a month<br><input type="radio"/> Once a week<br><input type="radio"/> 2 - 3 times a week<br><input type="radio"/> 4 - 5 times a week<br><input type="radio"/> 6 - 7 times a week | <input type="radio"/> Less than 30 minutes<br><input type="radio"/> 30 - 59 minutes<br><input type="radio"/> 60 - 119 minutes<br><input type="radio"/> 2 - 4 hours<br><input type="radio"/> More than 4 hours |
| Jogging, running or orienteering                    | <input type="radio"/> 1 - 3 times a month<br><input type="radio"/> Once a week<br><input type="radio"/> 2 - 3 times a week<br><input type="radio"/> 4 - 5 times a week<br><input type="radio"/> 6 - 7 times a week | <input type="radio"/> Less than 30 minutes<br><input type="radio"/> 30 - 59 minutes<br><input type="radio"/> 60 - 119 minutes<br><input type="radio"/> 2 - 4 hours<br><input type="radio"/> More than 4 hours |
| Athletics (e.g. high jump, long jump or three-step) | <input type="radio"/> 1 - 3 times a month<br><input type="radio"/> Once a week<br><input type="radio"/> 2 - 3 times a week<br><input type="radio"/> 4 - 5 times a week<br><input type="radio"/> 6 - 7 times a week | <input type="radio"/> Less than 30 minutes<br><input type="radio"/> 30 - 59 minutes<br><input type="radio"/> 60 - 119 minutes<br><input type="radio"/> 2 - 4 hours<br><input type="radio"/> More than 4 hours |
| Spinning or cycling in demanding terrain            | <input type="radio"/> 1 - 3 times a month<br><input type="radio"/> Once a week<br><input type="radio"/> 2 - 3 times a week<br><input type="radio"/> 4 - 5 times a week<br><input type="radio"/> 6 - 7 times a week | <input type="radio"/> Less than 30 minutes<br><input type="radio"/> 30 - 59 minutes<br><input type="radio"/> 60 - 119 minutes<br><input type="radio"/> 2 - 4 hours<br><input type="radio"/> More than 4 hours |
| Swimming                                            | <input type="radio"/> 1 - 3 times a month<br><input type="radio"/> Once a week                                                                                                                                     | <input type="radio"/> Less than 30 minutes<br><input type="radio"/> 30 - 59 minutes                                                                                                                           |

|                                                                  | Number of times                                                                                                                                                                                                    | Time per session                                                                                                                                                                                              |
|------------------------------------------------------------------|--------------------------------------------------------------------------------------------------------------------------------------------------------------------------------------------------------------------|---------------------------------------------------------------------------------------------------------------------------------------------------------------------------------------------------------------|
|                                                                  | <input type="radio"/> 2 - 3 times a week<br><input type="radio"/> 4 - 5 times a week<br><input type="radio"/> 6 - 7 times a week                                                                                   | <input type="radio"/> 60 - 119 minutes<br><input type="radio"/> 2 - 4 hours<br><input type="radio"/> More than 4 hours                                                                                        |
| Ball sports (e.g. soccer, basketball, volley ball or floor ball) | <input type="radio"/> 1 - 3 times a month<br><input type="radio"/> Once a week<br><input type="radio"/> 2 - 3 times a week<br><input type="radio"/> 4 - 5 times a week<br><input type="radio"/> 6 - 7 times a week | <input type="radio"/> Less than 30 minutes<br><input type="radio"/> 30 - 59 minutes<br><input type="radio"/> 60 - 119 minutes<br><input type="radio"/> 2 - 4 hours<br><input type="radio"/> More than 4 hours |
| Golf                                                             | <input type="radio"/> 1 - 3 times a month<br><input type="radio"/> Once a week<br><input type="radio"/> 2 - 3 times a week<br><input type="radio"/> 4 - 5 times a week<br><input type="radio"/> 6 - 7 times a week | <input type="radio"/> Less than 30 minutes<br><input type="radio"/> 30 - 59 minutes<br><input type="radio"/> 60 - 119 minutes<br><input type="radio"/> 2 - 4 hours<br><input type="radio"/> More than 4 hours |
| Dance class or competitive dancing                               | <input type="radio"/> 1 - 3 times a month<br><input type="radio"/> Once a week<br><input type="radio"/> 2 - 3 times a week<br><input type="radio"/> 4 - 5 times a week<br><input type="radio"/> 6 - 7 times a week | <input type="radio"/> Less than 30 minutes<br><input type="radio"/> 30 - 59 minutes<br><input type="radio"/> 60 - 119 minutes<br><input type="radio"/> 2 - 4 hours<br><input type="radio"/> More than 4 hours |
| Horseback riding                                                 | <input type="radio"/> 1 - 3 times a month<br><input type="radio"/> Once a week<br><input type="radio"/> 2 - 3 times a week<br><input type="radio"/> 4 - 5 times a week<br><input type="radio"/> 6 - 7 times a week | <input type="radio"/> Less than 30 minutes<br><input type="radio"/> 30 - 59 minutes<br><input type="radio"/> 60 - 119 minutes<br><input type="radio"/> 2 - 4 hours<br><input type="radio"/> More than 4 hours |
| Skating, ice-hockey or bandy                                     | <input type="radio"/> 1 - 3 times a month<br><input type="radio"/> Once a week<br><input type="radio"/> 2 - 3 times a week<br><input type="radio"/> 4 - 5 times a week<br><input type="radio"/> 6 - 7 times a week | <input type="radio"/> Less than 30 minutes<br><input type="radio"/> 30 - 59 minutes<br><input type="radio"/> 60 - 119 minutes<br><input type="radio"/> 2 - 4 hours<br><input type="radio"/> More than 4 hours |
| Skiing, downhill or cross country                                | <input type="radio"/> 1 - 3 times a month<br><input type="radio"/> Once a week<br><input type="radio"/> 2 - 3 times a week<br><input type="radio"/> 4 - 5 times a week<br><input type="radio"/> 6 - 7 times a week | <input type="radio"/> Less than 30 minutes<br><input type="radio"/> 30 - 59 minutes<br><input type="radio"/> 60 - 119 minutes<br><input type="radio"/> 2 - 4 hours<br><input type="radio"/> More than 4 hours |
| Martial arts (e.g. judo or karate)                               | <input type="radio"/> 1 - 3 times a month<br><input type="radio"/> Once a week<br><input type="radio"/> 2 - 3 times a week<br><input type="radio"/> 4 - 5 times a week<br><input type="radio"/> 6 - 7 times a week | <input type="radio"/> Less than 30 minutes<br><input type="radio"/> 30 - 59 minutes<br><input type="radio"/> 60 - 119 minutes<br><input type="radio"/> 2 - 4 hours<br><input type="radio"/> More than 4 hours |
| Boxing or wrestling                                              | <input type="radio"/> 1 - 3 times a month<br><input type="radio"/> Once a week<br><input type="radio"/> 2 - 3 times a week<br><input type="radio"/> 4 - 5 times a week<br><input type="radio"/> 6 - 7 times a week | <input type="radio"/> Less than 30 minutes<br><input type="radio"/> 30 - 59 minutes<br><input type="radio"/> 60 - 119 minutes<br><input type="radio"/> 2 - 4 hours<br><input type="radio"/> More than 4 hours |
| Tennis, badminton or table tennis                                | <input type="radio"/> 1 - 3 times a month<br><input type="radio"/> Once a week<br><input type="radio"/> 2 - 3 times a week<br><input type="radio"/> 4 - 5 times a week<br><input type="radio"/> 6 - 7 times a week | <input type="radio"/> Less than 30 minutes<br><input type="radio"/> 30 - 59 minutes<br><input type="radio"/> 60 - 119 minutes<br><input type="radio"/> 2 - 4 hours<br><input type="radio"/> More than 4 hours |
| Squash                                                           | <input type="radio"/> 1 - 3 times a month                                                                                                                                                                          | <input type="radio"/> Less than 30 minutes                                                                                                                                                                    |

|                                      | Number of times                                                                                                                                                                                                    | Time per session                                                                                                                                                                                              |
|--------------------------------------|--------------------------------------------------------------------------------------------------------------------------------------------------------------------------------------------------------------------|---------------------------------------------------------------------------------------------------------------------------------------------------------------------------------------------------------------|
|                                      | <input type="radio"/> Once a week<br><input type="radio"/> 2 - 3 times a week<br><input type="radio"/> 4 - 5 times a week<br><input type="radio"/> 6 - 7 times a week                                              | <input type="radio"/> 30 - 59 minutes<br><input type="radio"/> 60 - 119 minutes<br><input type="radio"/> 2 - 4 hours<br><input type="radio"/> More than 4 hours                                               |
| Sailing, surfing, canoeing or rowing | <input type="radio"/> 1 - 3 times a month<br><input type="radio"/> Once a week<br><input type="radio"/> 2 - 3 times a week<br><input type="radio"/> 4 - 5 times a week<br><input type="radio"/> 6 - 7 times a week | <input type="radio"/> Less than 30 minutes<br><input type="radio"/> 30 - 59 minutes<br><input type="radio"/> 60 - 119 minutes<br><input type="radio"/> 2 - 4 hours<br><input type="radio"/> More than 4 hours |
| Motor sports (e.g. motocross)        | <input type="radio"/> 1 - 3 times a month<br><input type="radio"/> Once a week<br><input type="radio"/> 2 - 3 times a week<br><input type="radio"/> 4 - 5 times a week<br><input type="radio"/> 6 - 7 times a week | <input type="radio"/> Less than 30 minutes<br><input type="radio"/> 30 - 59 minutes<br><input type="radio"/> 60 - 119 minutes<br><input type="radio"/> 2 - 4 hours<br><input type="radio"/> More than 4 hours |
| Rock climbing                        | <input type="radio"/> 1 - 3 times a month<br><input type="radio"/> Once a week<br><input type="radio"/> 2 - 3 times a week<br><input type="radio"/> 4 - 5 times a week<br><input type="radio"/> 6 - 7 times a week | <input type="radio"/> Less than 30 minutes<br><input type="radio"/> 30 - 59 minutes<br><input type="radio"/> 60 - 119 minutes<br><input type="radio"/> 2 - 4 hours<br><input type="radio"/> More than 4 hours |
| Yoga, Pilates or Tai chi             | <input type="radio"/> 1 - 3 times a month<br><input type="radio"/> Once a week<br><input type="radio"/> 2 - 3 times a week<br><input type="radio"/> 4 - 5 times a week<br><input type="radio"/> 6 - 7 times a week | <input type="radio"/> Less than 30 minutes<br><input type="radio"/> 30 - 59 minutes<br><input type="radio"/> 60 - 119 minutes<br><input type="radio"/> 2 - 4 hours<br><input type="radio"/> More than 4 hours |
| Other (displayed automatically)      | <input type="radio"/> 1 - 3 times a month<br><input type="radio"/> Once a week<br><input type="radio"/> 2 - 3 times a week<br><input type="radio"/> 4 - 5 times a week<br><input type="radio"/> 6 - 7 times a week | <input type="radio"/> Less than 30 minutes<br><input type="radio"/> 30 - 59 minutes<br><input type="radio"/> 60 - 119 minutes<br><input type="radio"/> 2 - 4 hours<br><input type="radio"/> More than 4 hours |

**Do you compete regularly in a sport?**

**Follow-up question if respondent reported regular physical activity**

- ☐ Yes  
☐ No  
☐ Don't know / Don't want to answer

**How many hours do you usually sleep during a typical night?**

- ☐ Less than 5 hours    ☐ 9 hours  
☐ 6 hours                ☐ 10 hours or longer  
☐ 7 hours                 ☐ Don't know / Don't want to answer  
☐ 8 hours
